# Supplementary material for: Topographic modulation on the layered circulation in the South China Sea
Source: Copernicus journal article supplement (doi:10.5194/os-21-1291-2025), 2025-07-10
Supplement: Supplementary file 1 [file os-21-1291-2025-supplement.pdf]

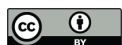

*Supplement of*

## **Topographic modulation on the layered circulation in the South China Sea**

**Qibang Tang et al.**

*Correspondence to:* Zhongya Cai ([zycai@um.edu.mo](mailto:zycai@um.edu.mo))

The copyright of individual parts of the supplement might differ from the article licence.

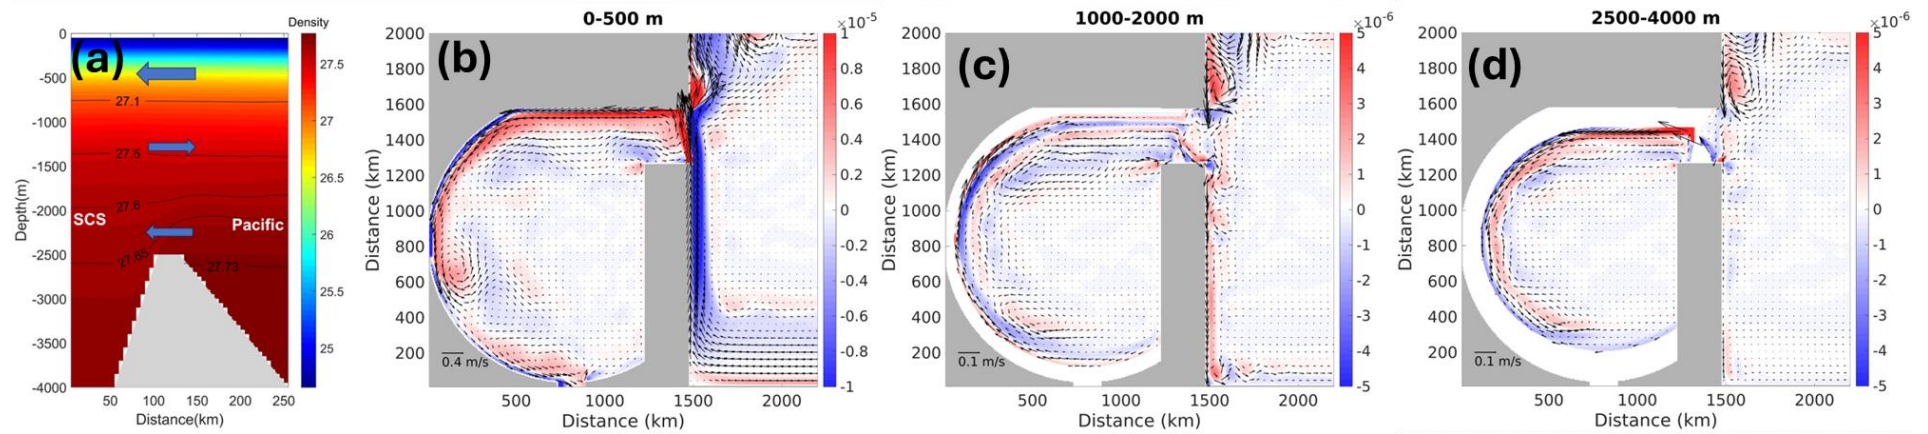

Figure S1. (a) Vertical transect of density (represented by color shading and contour lines) across the Luzon Strait. The left side represents the SCS basin, while the right side corresponds to the Pacific basin. Schematic arrows indicate the direction of the exchange flow between the two basins. (b-c) The horizontal circulation (arrows) and depth averaged vorticity (color) of (b) upper layer 0-500 m, (c) middle layer 1000-2000 m and (d) deep layer 2500-4000 m in the standard case.
